# Supplementary material
Source: PubMed Central journal article supplement (PMC152990)

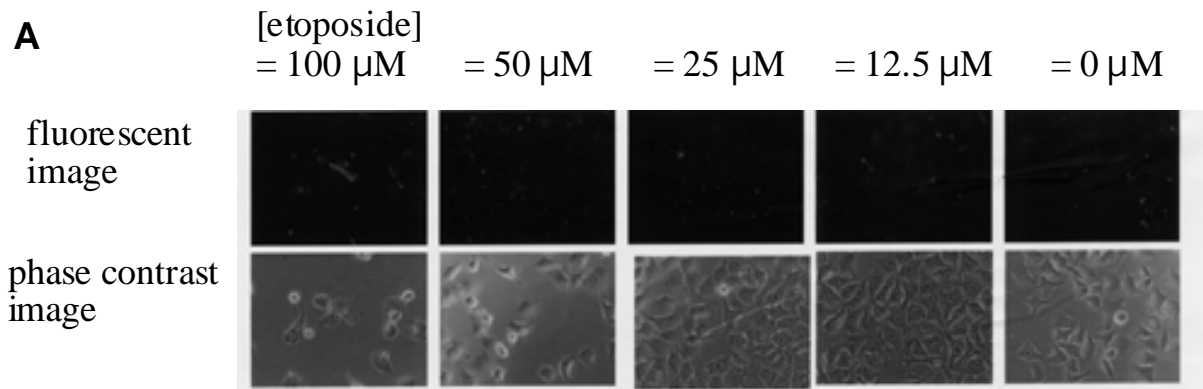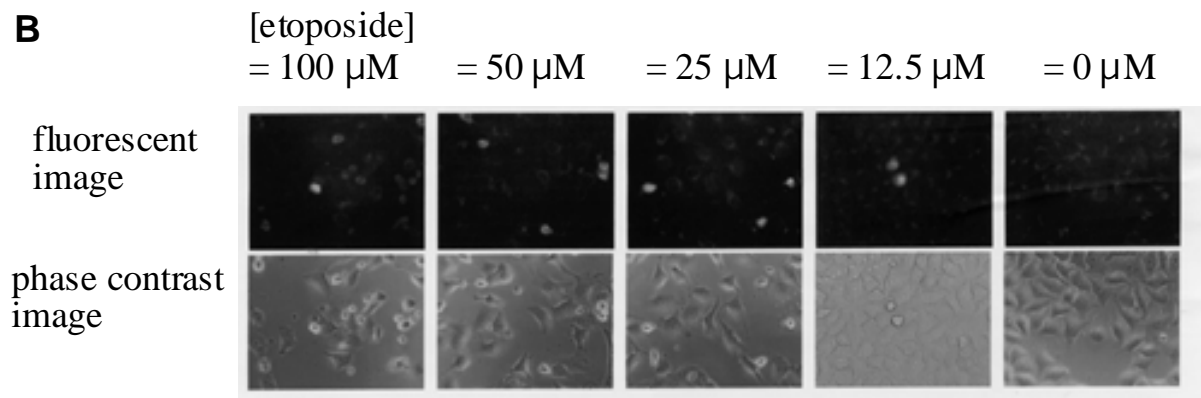

Supplement: pnas_0637275100_2.pdf [file pnas_0637275100_2.pdf]
